# Supplementary material
Source: PubMed Central journal article supplement (PMC8197753)
Supplement: NIHMS1693198-supplement-1.pdf [file NIHMS1693198-supplement-1.pdf]

Supplemental Figure 1.

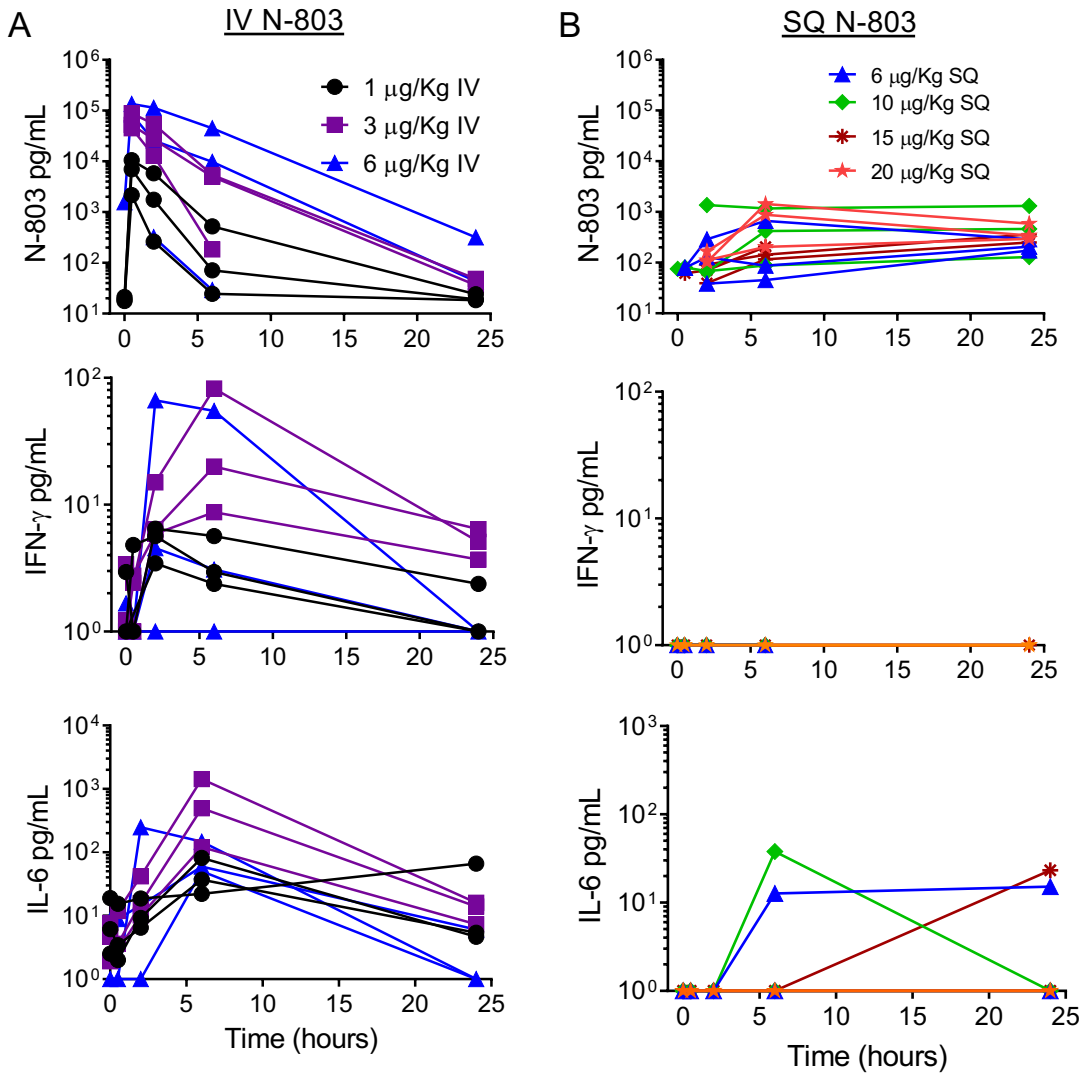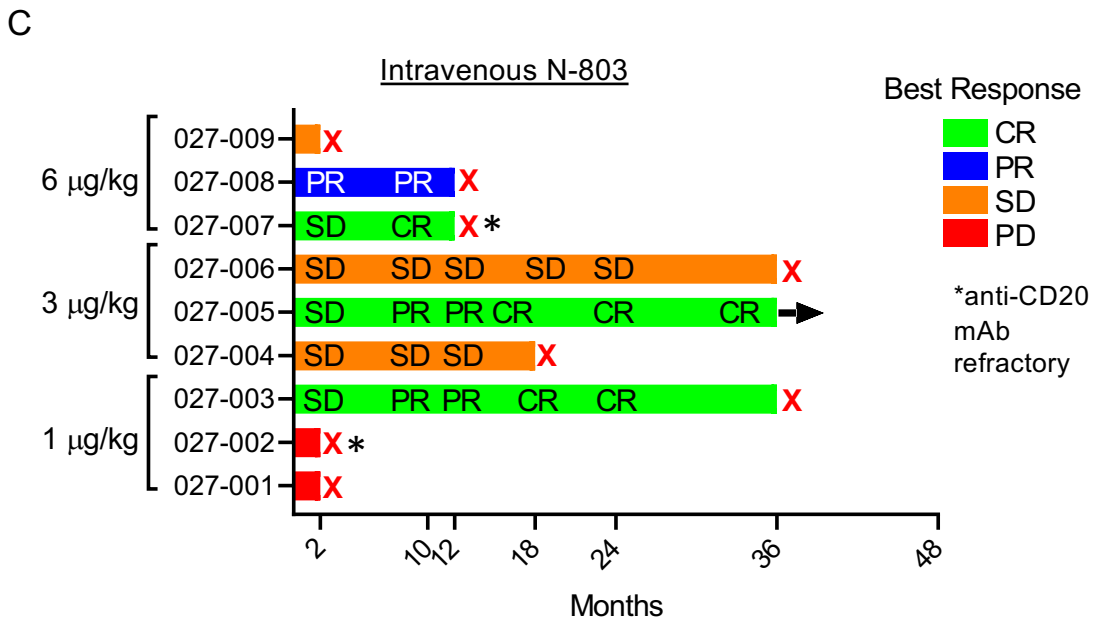

**Supplementary Figure 1. Serum Immunogenicity and Cytokine Measurements.** Serum levels of N-803, IFN- $\gamma$ , and IL-6 in A) IV treated patients or B) SQ treated patients. Colored lines denote N-803 dose, and each line represents a patient. n = 2-3 per cohort. C) Swimmer plot for IV N-803 patients depicting best clinical responses across follow-up by dose. n = 9. Red X denotes PD. \* denotes rituximab-refractory patient.
