# Supplementary material
Source: PubMed Central journal article supplement (PMC8197753)
Supplement: NIHMS1693198-supplement-2.pdf [file NIHMS1693198-supplement-2.pdf]

**Supplemental Figure 2.**

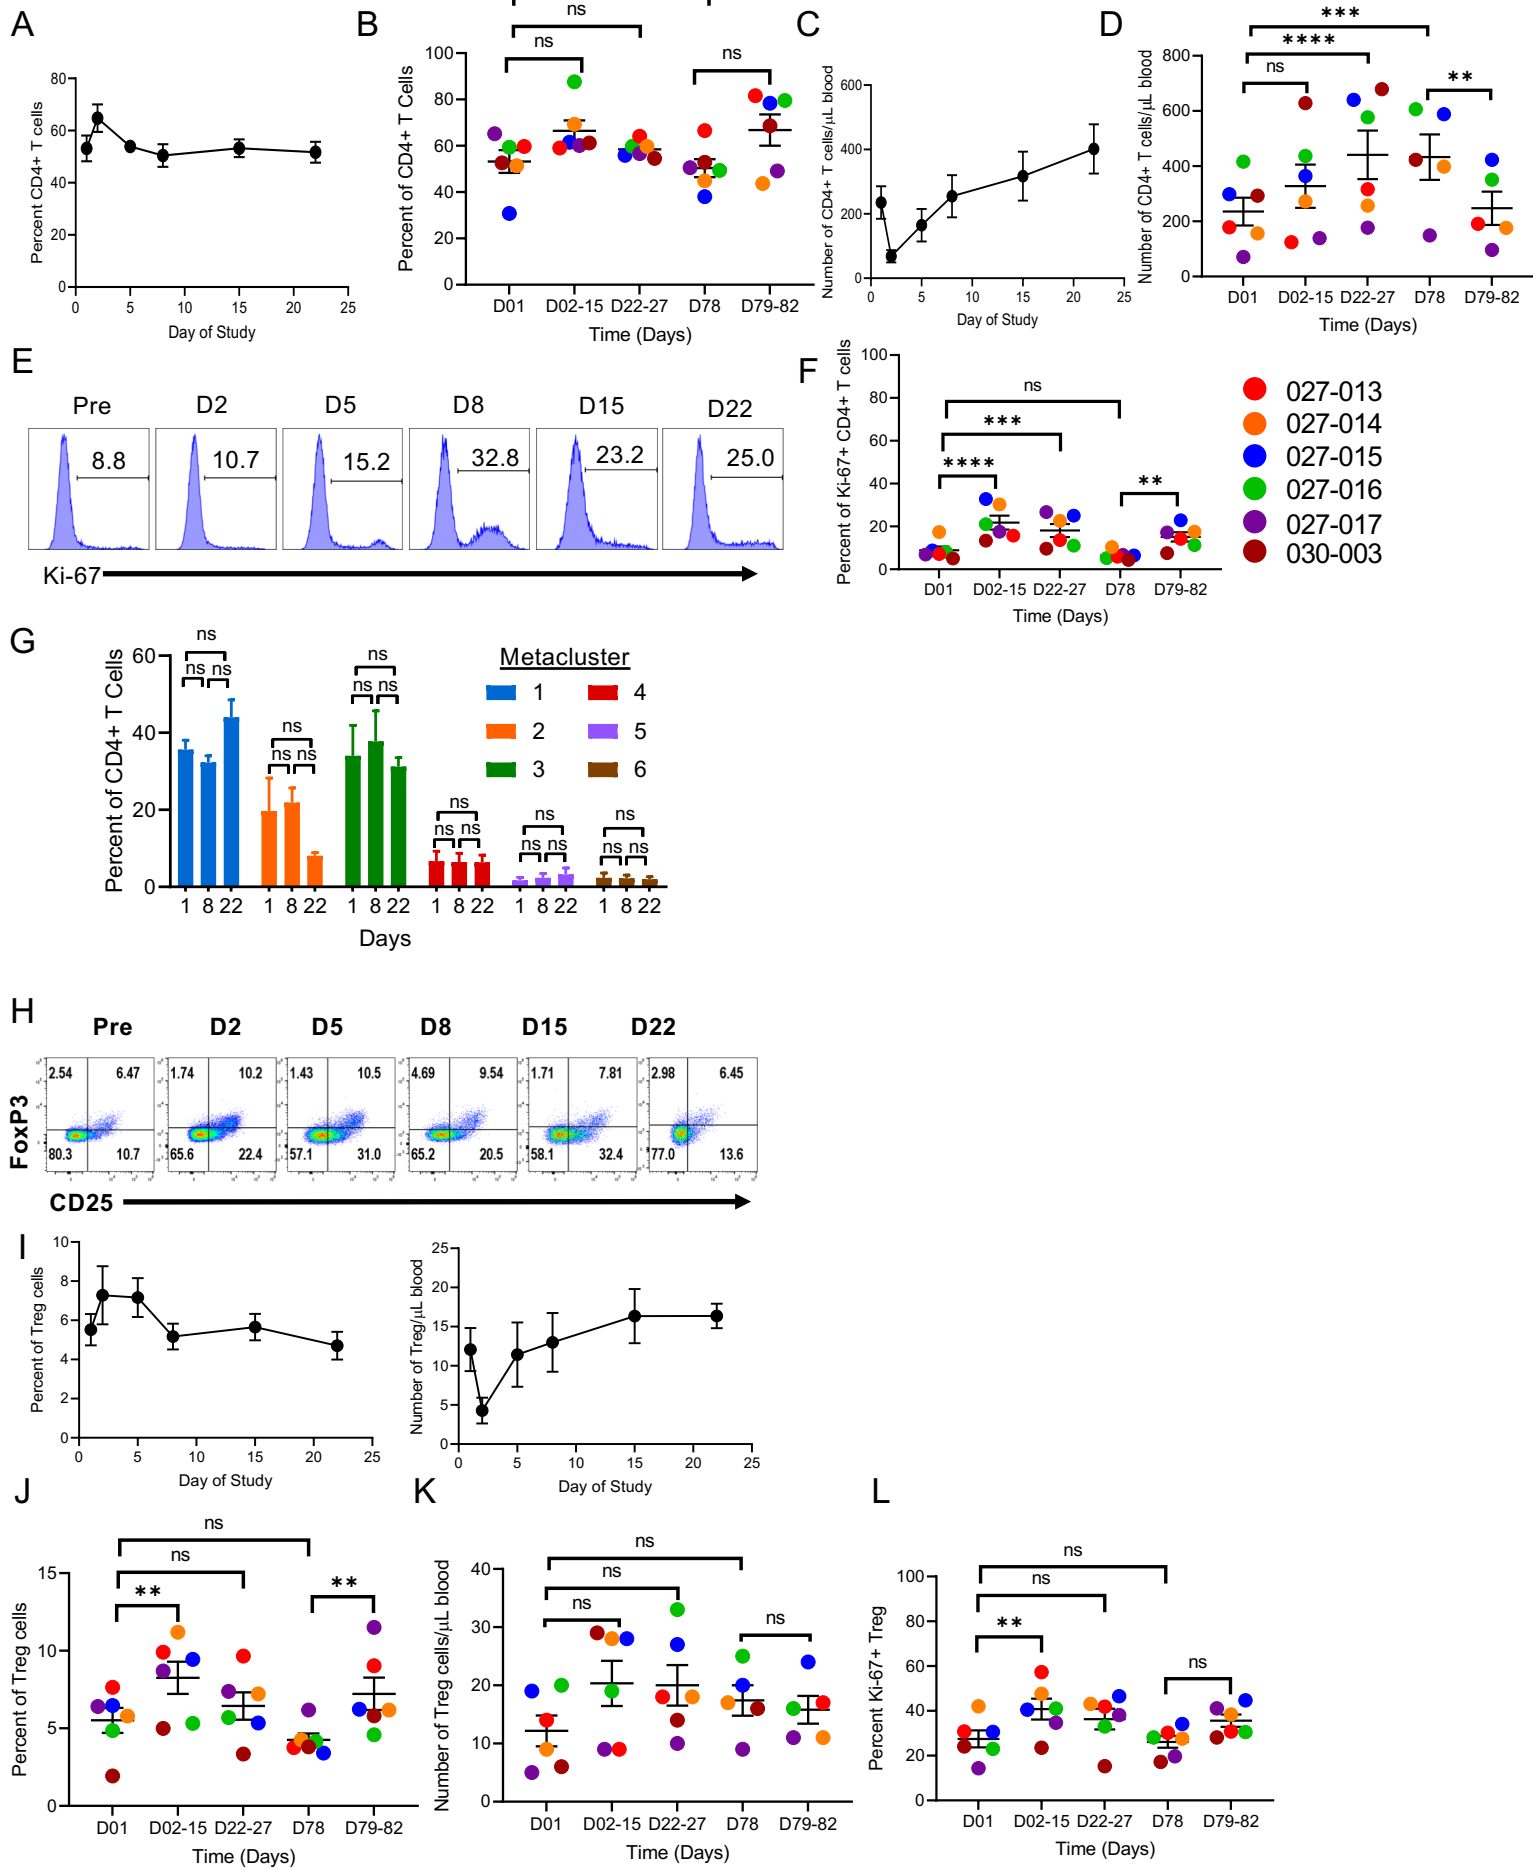

**Supplementary Figure 2. Effect of N-803 and Rituximab on CD4+ T cells.** A) Line and B) Dot plot of the percent of CD4+ T cells. C) Line and D) Dot plot of the absolute number of CD4+ T cells per  $\mu\text{l}$  of blood. E) Representative flow histograms of Ki67 expression on CD4+ T cells at each time point. Number denotes percentage of Ki67+ CD4 T cells. F) Dot plots of percent of Ki-67+ CD4+ T cells by time point. Linear mixed models statistical analysis for all of the above. G) Bar graph of percent of each metacluster at each time point. 2-way RM ANOVA with Tukey's multiple comparisons. Significance  $p < 0.05$ . H) Representative flow dot plots depicting percentage of Tregs in CD4+ T cells across time. I) Line and J-K) dot plots depicting the percent and absolute number of Tregs across time. L) Percent of Ki-67+ Treg cells. Mean  $\pm$  SEM for all. Each dot represents a patient. Linear mixed models statistical analysis for all of the above with significance  $p < 0.01$ .  $n = 5-6$ .  $\geq 3$  independent experiments. \* =  $p < 0.05$ , \*\* =  $p \leq 0.01$ , \*\*\* =  $p \leq 0.001$ , \*\*\*\* =  $p \leq 0.0001$ .
