# Supplementary material
Source: PubMed Central journal article supplement (PMC8197753)
Supplement: NIHMS1693198-supplement-5.pdf [file NIHMS1693198-supplement-5.pdf]

**Supplementary Table 2. CITE-seq Antibody Panel.** The antibody, clone, and manufacturer used to phenotype patient PBMC is shown \* Denotes Antibodies used in ADT & RNA combined clustering. Batch Denotes which antibodies were used on each Batch.

| Antibody                           | Catalog | Key Res. ID | Clone    | Manufacturer                       | Batch |
|------------------------------------|---------|-------------|----------|------------------------------------|-------|
| Mouse anti-human NKG2D*            | 320837  | AB_2800844  | 1D11     | Biologend                          | Both  |
| Mouse anti-human HLA-DR*           | 307663  | AB_2800795  | L243     | Biologend                          | Both  |
| Mouse anti-human CD62L*            | 304851  | AB_2800770  | DREG-56  | Biologend                          | Both  |
| Mouse anti-human CD45RO*           | 304259  | AB_2800766  | UCHL1    | Biologend                          | Both  |
| Mouse anti-human NKp30*            | 325219  | AB_2800851  | P30-15   | Biologend                          | Both  |
| Mouse anti-human CD56*             | 362559  | AB_2801002  | 5.1H11   | Biologend                          | Both  |
| Mouse anti-human NKp46*            | 331941  | AB_2800874  | 9E2      | Biologend                          | Both  |
| Mouse anti-human CD57*             | 393321  | AB_2801030  | QA17A04  | Biologend                          | Both  |
| Mouse anti-human CD45RA*           | 304163  | AB_2800764  | HI100    | Biologend                          | Both  |
| Mouse anti-human CD11b*            | 301359  | AB_2800732  | ICRF44   | Biologend                          | Both  |
| Mouse anti-human CD16*             | 302065  | AB_2800738  | 3G8      | Biologend                          | Both  |
| Mouse anti-human CD25*             | 302649  | AB_2800745  | BC96     | Biologend                          | Both  |
| Mouse anti-human CD107a*           | 328649  | AB_2800854  | H4A3     | Biologend                          | Both  |
| Mouse anti-human CD117*            | 313243  | AB_2810474  | 104D2    | Biologend                          | 2     |
| Mouse anti-human NKp44*            | 325119  | AB_2810484  | P44-8    | Biologend                          | 2     |
| Recombinant anti-human NKG2A*      |         |             |          | Purified Antibody: Miltenyi Biotec | 2     |
|                                    | custom  | AB_2801908  | REA110   | Conjugation: Biologend             |       |
| Mouse IgG1 isotype control*        | 400187  | AB_2888921  | MOPC-21  | Biologend                          | 2     |
| Mouse IgG2a isotype control*       | 400293  | AB_2888922  | MOPC-173 | Biologend                          | 2     |
| Mouse IgG2b isotype control*       | 400381  | AB_2888923  | MPC-11   | Biologend                          | 2     |
| Mouse anti-human KIR2DL1/S1/S3/S5* | 339517  | AB_2814252  | HP-MA4   | Biologend                          | 2     |
| Mouse anti-human KIR2DL2/3*        | 312619  | AB_2819944  | DX27     | Biologend                          | 2     |
| Mouse anti-human KIR3DL1*          | 312725  | AB_2814161  | DX9      | Biologend                          | 2     |
| Mouse anti-human KIR2DL5*          | 341309  | AB_2810533  | UP-R1    | Biologend                          | 2     |
| Mouse anti-human CD94*             | 305523  | AB_2814143  | DX22     | Biologend                          | 2     |
| Mouse anti-human CCR7              | 353251  | AB_2800943  | G043H7   | Biologend                          | 1     |
| Mouse anti-human DNAM-1            | 338337  | AB_2800899  | 11A8     | Biologend                          | 1     |
| Hamster anti-human/mouse KLRG1     | 138433  | AB_2800649  | 2F1      | Biologend                          | 1     |
| Mouse anti-human CD38*             | 303543  | AB_2800758  | HIT2     | Biologend                          | Both  |
