# Supplementary material
Source: PubMed Central journal article supplement (PMC8197753)
Supplement: NIHMS1693198-supplement-6.pdf [file NIHMS1693198-supplement-6.pdf]

**Supplemental Table 1. Phenotypic mass cytometry panel.** The metal isotope, antibody, clone, and manufacture used to phenotype patient PBMC is shown. Markers used to identify cell subsets (v1), CD8 and CD4 T cell subsets (v2) and CD8 and CD4 metaclusters (FlowSOM, F) are indicated. The asterisk (\*) included after the source indicates antibodies that were custom-conjugated using Fluidigm antibody labeling kits, per manufacturer's instructions.

| Phenotypic CyTOF Panel |         |                         |          |                    |                  |                 | Clustering |      |
|------------------------|---------|-------------------------|----------|--------------------|------------------|-----------------|------------|------|
| Channel                | Isotope | Antibody                | Clone    | Manufacture        | Catalog Number   | Key Resource ID | v1         | v2/F |
| 89                     | Y       | CD45                    | HI30     | Fluidigm           | 3089003B         | AB_2661851      | X          | -    |
| 141                    | Pr      | CD14*                   | M5E2     | BD Biosciences     | 555396           | AB_395797       | X          | -    |
| 142                    | Nd      | CD19*                   | HIB19    | Biolegend          | 302202           | AB_2661817      | X          | -    |
| 143                    | Nd      | KIR3DL1*                | DX9      | R&D                | MAB1225          | AB_2130828      | -          | -    |
| 144                    | Nd      | CD38                    | HIT2     | Fluidigm           | 3144014B         | AB_2687640      | -          | X    |
| 145                    | Nd      | CD16                    | 3G8      | Fluidigm           | 3145008B         | AB_2888924      | X          | -    |
| 146                    | Nd      | KIR2DL1/2DS1*           | HP-3E4   | BD Biosciences     | 556061           | AB_396330       | -          | -    |
| 147                    | Nd      | NKG2D*                  | 1D11     | R&D                | NB100-65956      | AB_960833       | -          | -    |
| 148                    | Nd      | KIR2DL2/2DL3*           | CH-L     | BD Biosciences     | 559783           | AB_397324       | -          | -    |
| 149                    | Sm      | T-bet*                  | 4B10     | BD Biosciences     | 561262           | AB_10565981     | -          | X    |
| 150                    | Nd      | CD4*                    | OKT4     | EMD Millipore      | MABF419          | AB_2888925      | X          | -    |
| 151                    | Eu      | TRAIL*                  | RIK-2    | Biolegend          | 308202           | AB_345288       | -          | -    |
| 152                    | Sm      | CD8*                    | SK1      | Biolegend          | 344702           | AB_1877104      | X          | -    |
| 153                    | Eu      | CD62L                   | DREG-56  | Fluidigm           | 3153004B         | AB_2810245      | -          | X    |
| 154                    | Sm      | TIGIT                   | MBSA43   | Fluidigm           | 3154016B         | AB_2888926      | -          | X    |
| 155                    | Gd      | Eomes*                  | WD1928   | Invitrogen         | 14-4877-82       | AB_2572882      | -          | X    |
| 156                    | Gd      | CCR7*                   | G043H7   | Biolegend          | 353202           | AB_10945157     | -          | X    |
| 158                    | Gd      | CD137                   | 4B4-1    | Fluidigm           | 3158013B         | AB_2888927      | -          | X    |
| 159                    | Tb      | NKG2C*                  | 134591   | R&D                | MAB138           | AB_2132982      | -          | -    |
| 160                    | Gd      | PD-1*                   | J105     | Invitrogen         | 14-2799-80       | AB_763476       | -          | X    |
| 161                    | Dy      | NKp30*                  | P30-15   | Biolegend          | 325202           | AB_756106       | -          | -    |
| 162                    | Dy      | Ki-67                   | B56      | Fluidigm           | 3162012B         | AB_2888928      | -          | X    |
| 163                    | Dy      | CD127*                  | A019D5   | Biolegend          | 351302           | AB_10780844     | X          | X    |
| 164                    | Dy      | Tim-3*                  | F38-2E2  | Biolegend          | 345002           | AB_2116574      | -          | X    |
| 165                    | Ho      | CD45RO                  | UCHL1    | Fluidigm           | 3165011B         | AB_2756423      | -          | -    |
| 166                    | Er      | NKG2A*                  | Z199     | Beckman Coulter    | IM2750           | AB_131495       | -          | -    |
| 167                    | Er      | NKp44*                  | P44-8    | Biolegend          | 325102           | AB_756094       | -          | -    |
| 168                    | Er      | DNAM1*                  | DX11     | BD Biosciences     | 559787           | AB_397328       | -          | X    |
| 169                    | Tm      | CD25                    | 2A3      | Fluidigm           | 3169003B         | AB_2661806      | X          | X    |
| 170                    | Er      | HLA-DR                  | L243     | Fluidigm           | 3170013B         | AB_2888929      | X          | -    |
| 171                    | Yb      | Granzyme B              | GB11     | Fluidigm           | 3171002B         | AB_2687652      | -          | X    |
| 172                    | Yb      | CD57                    | HCD57    | Fluidigm           | 3172009B         | AB_2888930      | -          | X    |
| 173                    | Yb      | CD3*                    | UCHT1    | BD Biosciences     | 555330           | AB_11032211     | X          | -    |
| 174                    | Yb      | NKp46*                  | 9E2      | BD Biosciences     | 557911           | AB_396933       | -          | -    |
| 175                    | Lu      | LAG-3                   | 11C3C65  | Fluidigm           | 3175033B         | AB_2888932      | -          | X    |
| 176                    | Yb      | CD56                    | NCAM16.2 | Fluidigm           | 3176008B         | AB_2661813      | X          | -    |
| 209                    | Bi      | CD11b                   | ICRF44   | Fluidigm           | 3209003B         | AB_2687654      | X          | -    |
|                        |         | Cisplatinum             |          | Enzo Life Sciences | ALX-400-040-M050 |                 | -          | -    |
|                        |         | Cell-ID intercalator-Ir |          | Fluidigm           | 201192A          |                 | -          | -    |
