# Supplementary material
Source: PubMed Central journal article supplement (PMC8197753)
Supplement: NIHMS1693198-supplement-7.pdf [file NIHMS1693198-supplement-7.pdf]

**Supplemental Table 3. Summary of AntiDrug Antibody Data Incidence by Route of Administration**

| <b>Dose Route</b>                          | <b>IV<sup>A</sup></b> | <b>SC<sup>B</sup></b> |
|--------------------------------------------|-----------------------|-----------------------|
| <b>ADA incidence<sup>C</sup></b>           | 0/6 (0%)              | 0/11 (0%)             |
| <b>Overall ADA prevalence<sup>D</sup></b>  | 0/6 (0%)              | 0/11 (0%)             |
| <b>Baseline positive subjects</b>          | 0/6 (0%)              | 0/11 (0%)             |
| <b>Subjects with treatment-boosted ADA</b> | 0/6 (0%)              | 0/11 (0%)             |
| <b>Subjects with treatment-induced ADA</b> | 0/6 (0%)              | 0/11 (0%)             |

<sup>A</sup> Excludes 3 subjects without supporting documentation.

<sup>B</sup> Excludes 1 subject that did not have baseline ADA data prior to initiation of dosing.

<sup>C</sup> Proportion of subjects found to have seroconverted or boosted their pre-existing ADA with N-803 treatment.

<sup>D</sup> Proportion of subjects having drug-reactive antibodies at any point in time (including prior to any N-803 administration).
